# Supplementary material for: The Effect of Physical Training on Peripheral Blood Mononuclear Cell Ex Vivo Proliferation, Differentiation, Activity, and Reactive Oxygen Species Production in Racehorses
Source: PubMed Central journal article supplement (PMC7699811; doi:10.3390/antiox9111155), 2020-11-20
Supplement: antioxidants-09-01155-s001.pdf [file antioxidants-09-01155-s001.pdf]

## A. Total lymphocyte proliferation

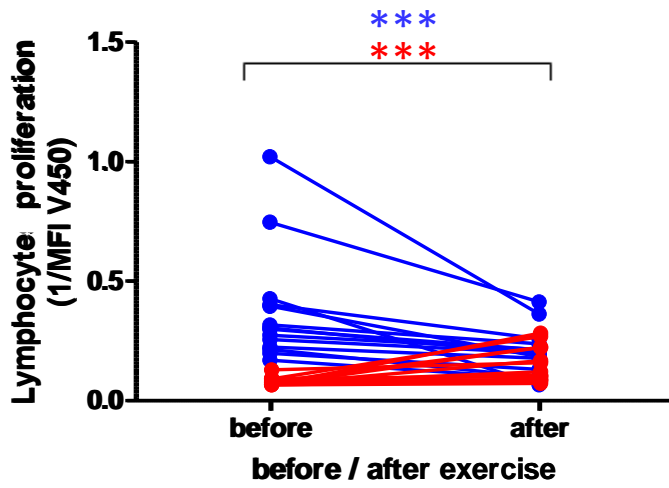

## B. CD4<sup>+</sup> lymphocyte proliferation

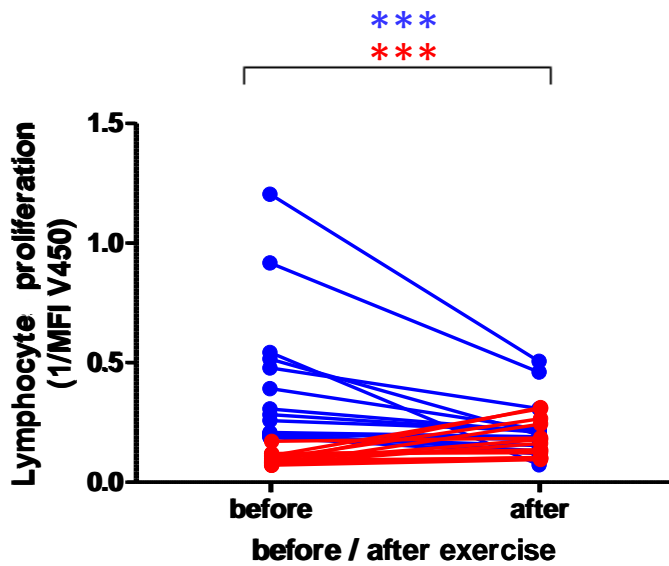

## C. CD8<sup>+</sup> lymphocyte proliferation

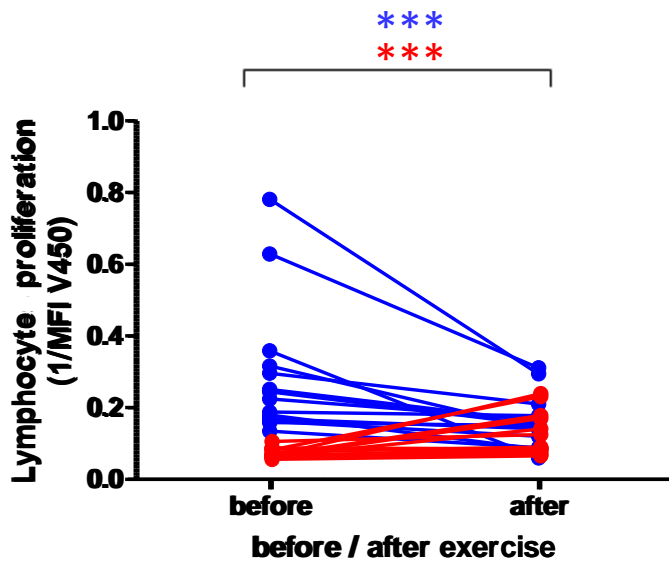

• untrained • well-trained

**CD4<sup>+</sup>**

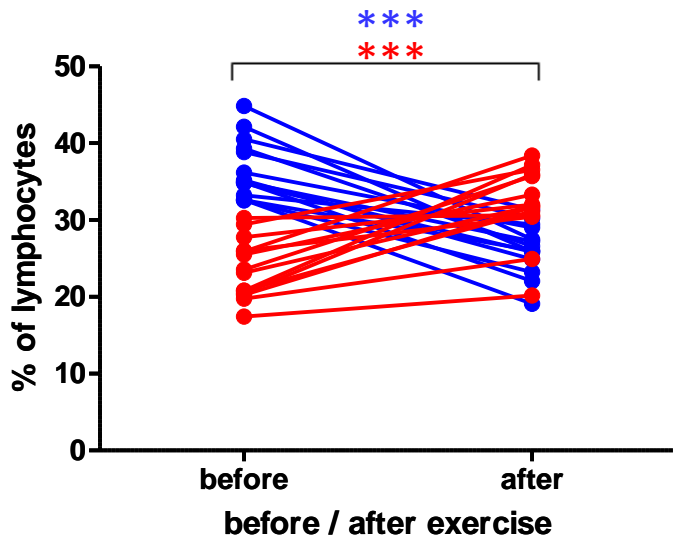

**CD8<sup>+</sup>**

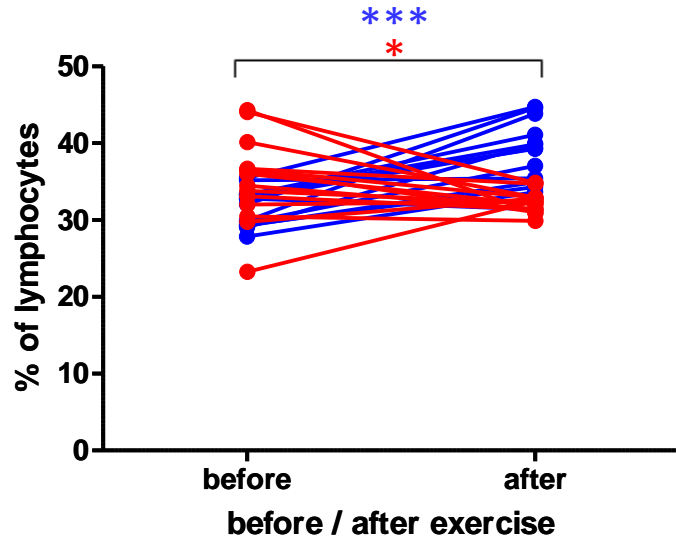

**CD4<sup>+</sup>FoxP3<sup>+</sup>**

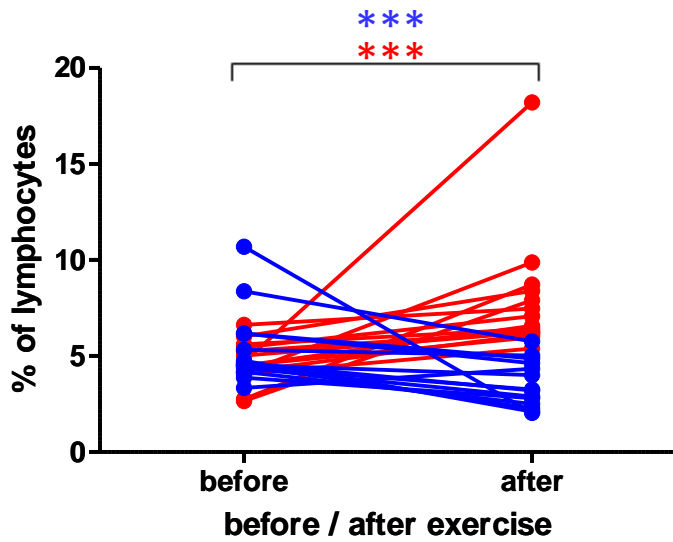

**CD8<sup>+</sup>FoxP3<sup>+</sup>**

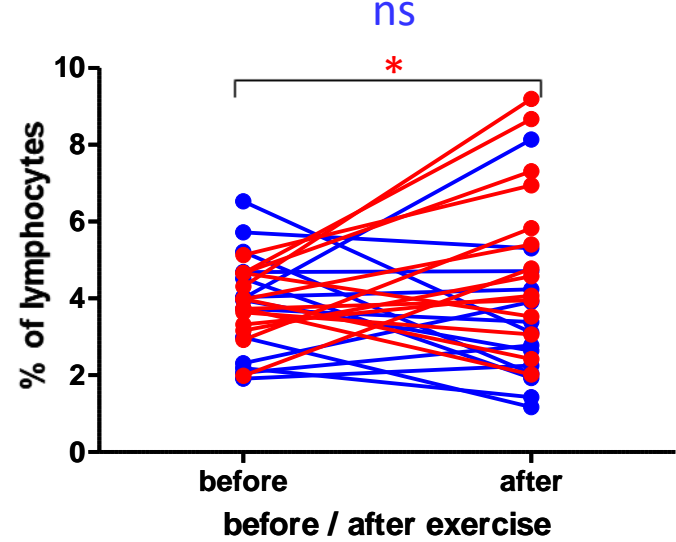

• untrained • well-trained

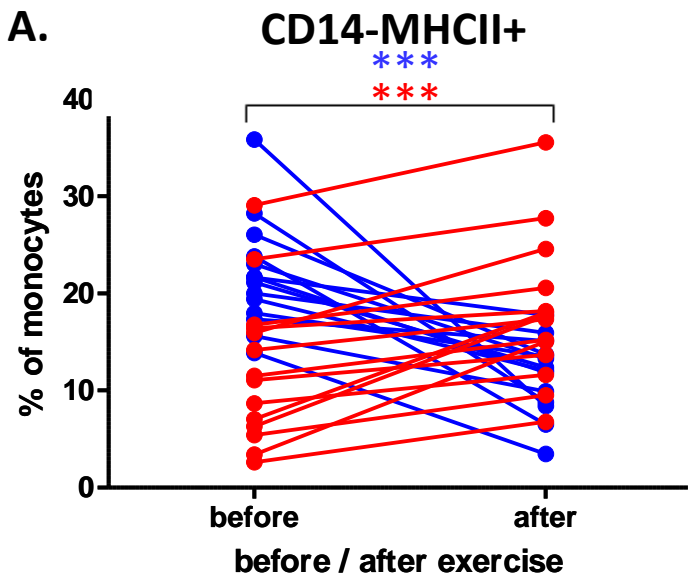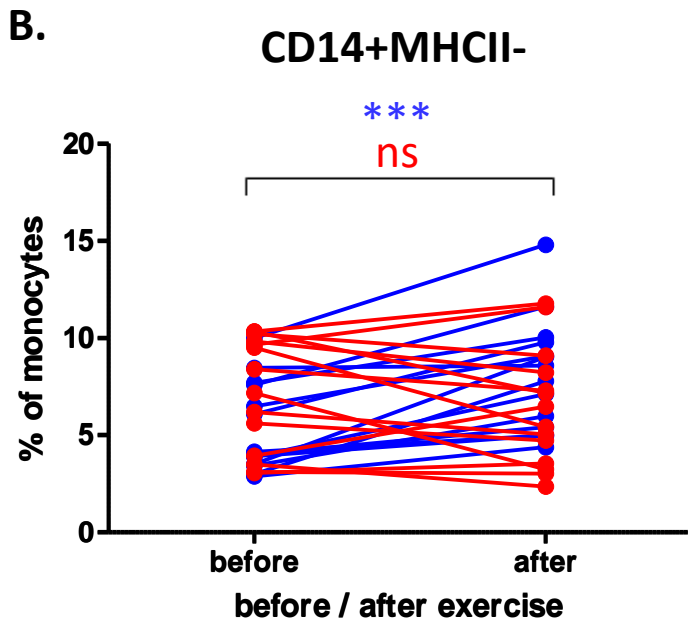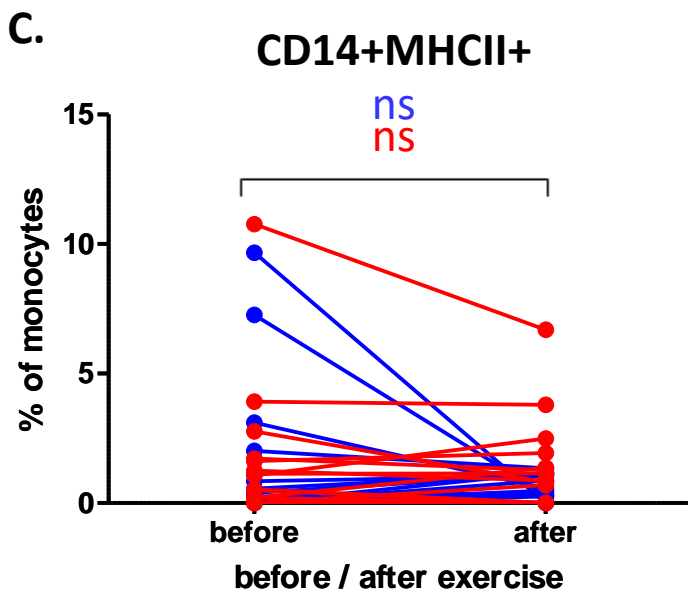

• untrained • well-trained

Supplementary Fig. 3.

**CD14+CR+**

ns

ns

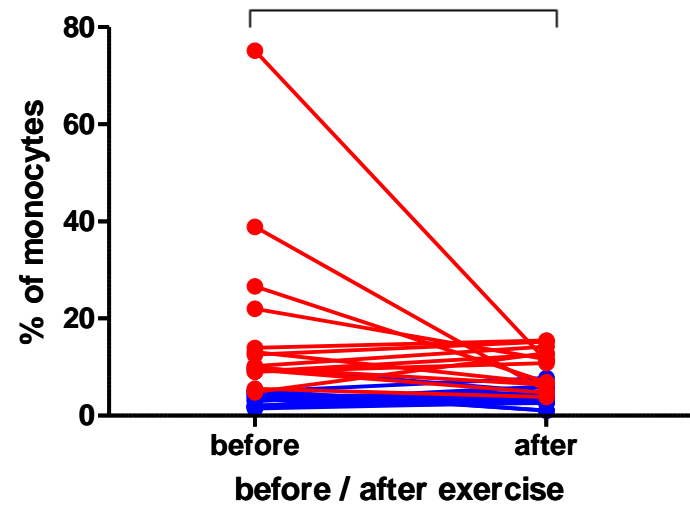

**CD5+CR+**

ns

\*

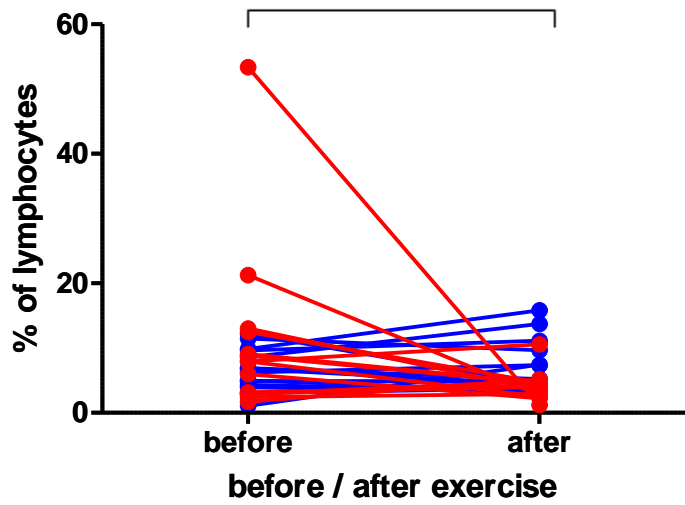

**CD14+CR+**

\*\*\*

\*\*\*

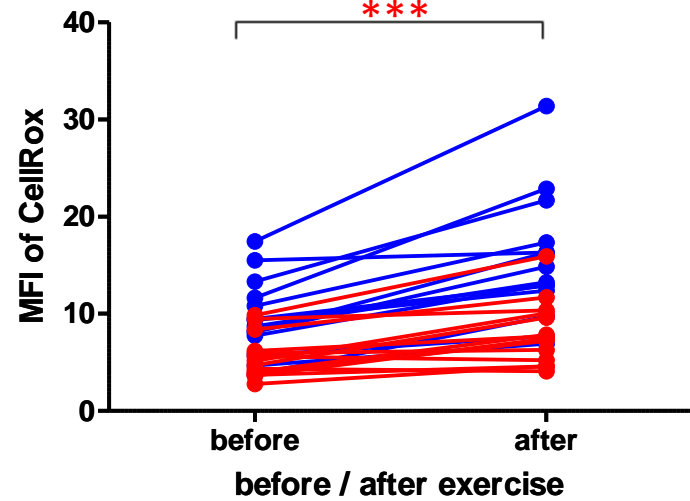

**CD5+CR+**

\*

ns

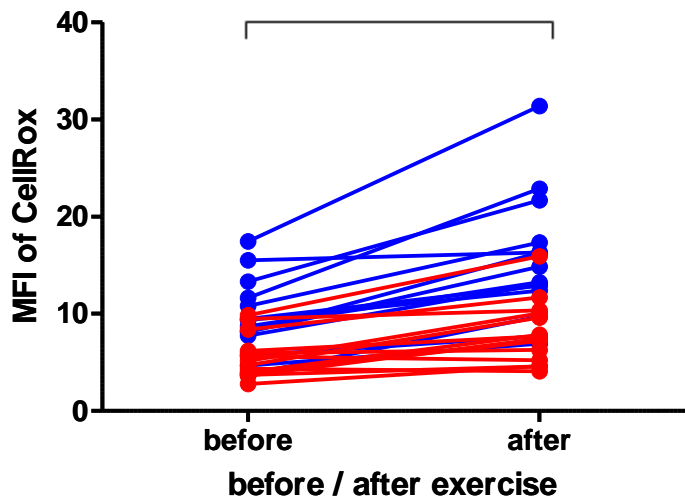

• untrained • well-trained

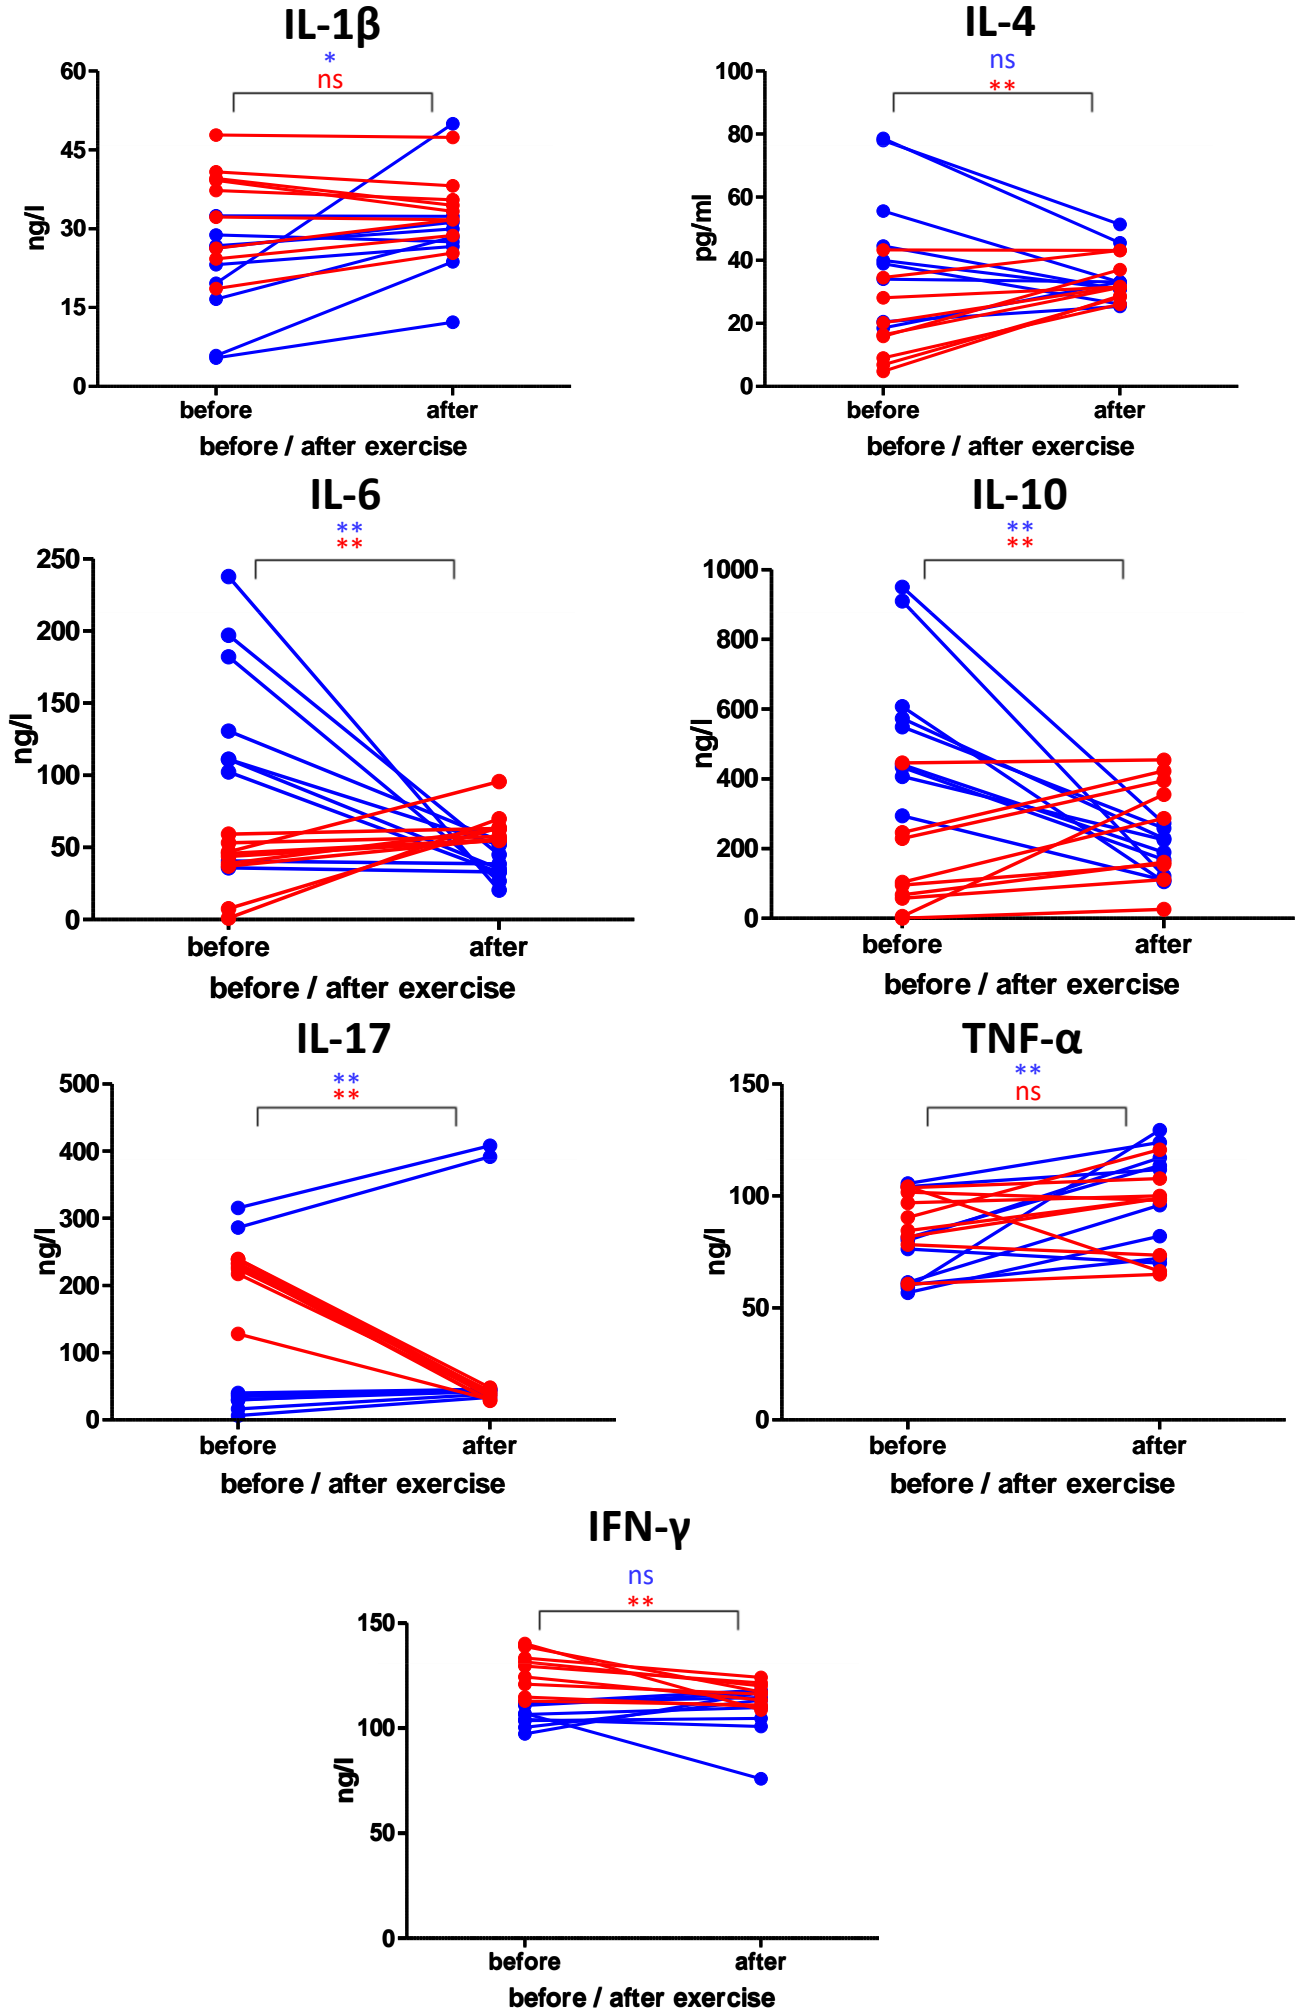

Supplementary Fig. 5.

• untrained • well-trained
